# Supplementary material for: Development of hyperbranched crosslinkers from bio-derived platform molecules for the synthesis of epoxidised soybean oil based thermosets
Source: Royal Society of Chemistry journal article supplement (doi:10.1039/c8ra07133k), 2018-01-01
Supplement: c8ra07133k1.pdf [file c8ra07133k1.pdf]

## Development of hyperbranched crosslinkers from bio-derived platform molecules for the synthesis of epoxidised soybean oil based thermosets

Trin Kamjornsupamitr, Andrew J. Hunt, and Nontipa Supanchaiyamat\*

*Materials Chemistry Research Center, Department of Chemistry and Center of Excellence for Innovation in Chemistry, Faculty of Science, Khon Kaen University, Khon Kaen 40002, Thailand. E-mail: nontsu@kku.ac.th*

### Supplementary Information

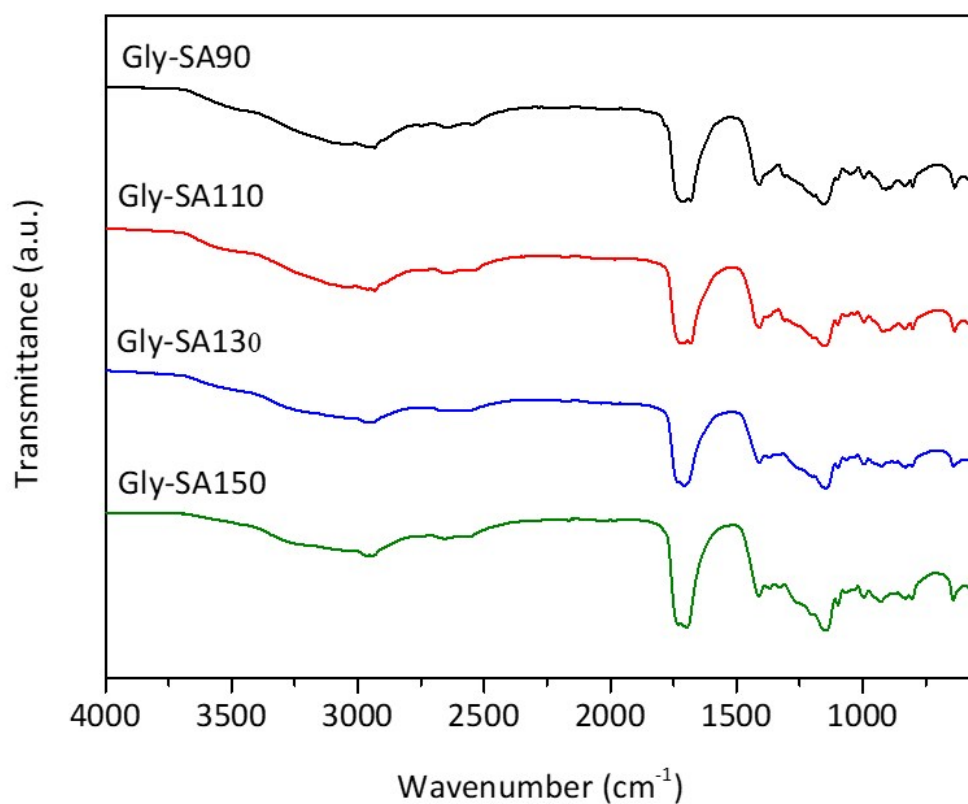

**Fig. S1** FTIR spectra of Gly-SA crosslinkers.

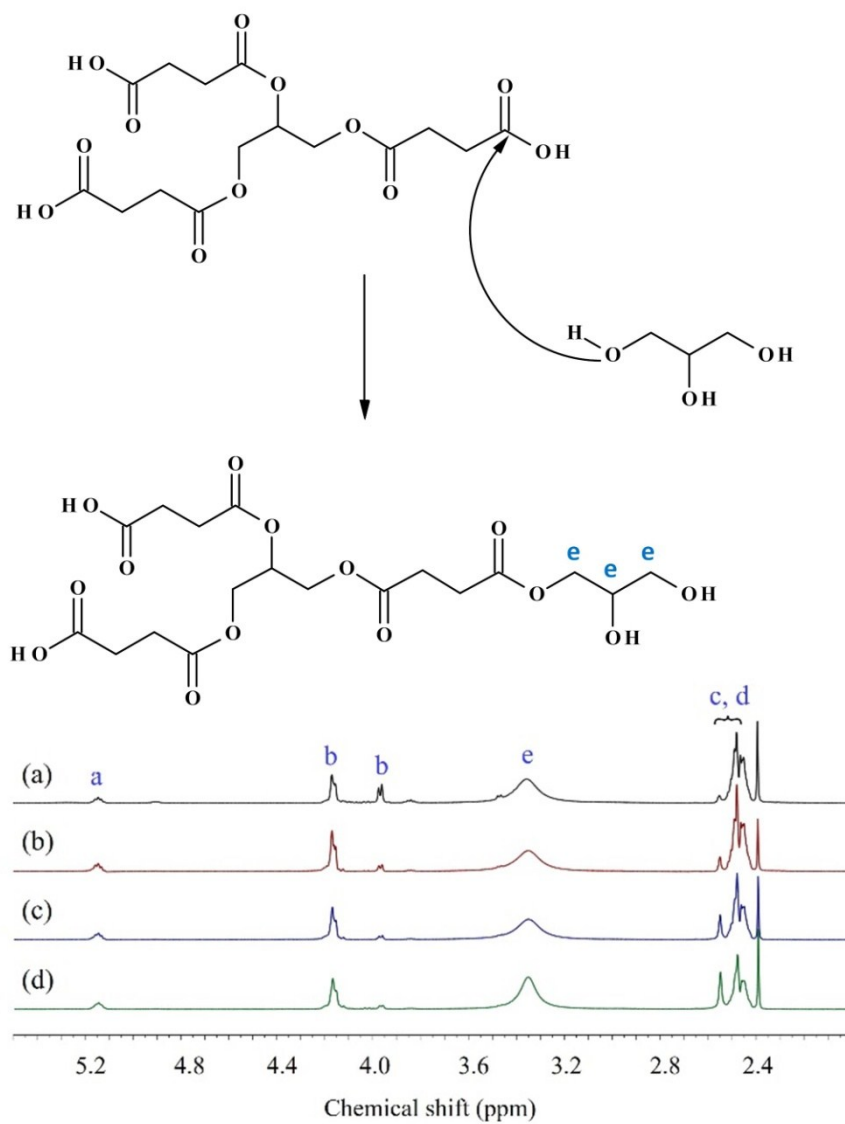

**Fig. S2**  $^1\text{H}$  NMR spectra of (a) Gly-SA90, (b) Gly-SA110, (c) Gly-SA130 and (d) Gly-SA150.
